# Supplementary material
Source: PubMed Central journal article supplement (PMC10482168)
Supplement: NIHMS1922381-supplement-ci-2021-012833.pdf [file NIHMS1922381-supplement-ci-2021-012833.pdf]

## Supporting Information

### Effect of an Inhibitor on the ACE2-Receptor Binding Domain of SARS-CoV-2

Gaurav Sharma<sup>†</sup>, Lin Frank Song<sup>†</sup>, Kenneth M. Merz<sup>†‡</sup> \*

<sup>†</sup>Department of Chemistry, Michigan State University,

East Lansing, Michigan 48824, United States

<sup>‡</sup>Department of Biochemistry and Molecular Biology, Michigan State University,

East Lansing, Michigan 48824, United States

*\*Corresponding Author:* Kenneth M. Merz

*\*Corresponding Author Email:* merz@chemistry.msu.edu

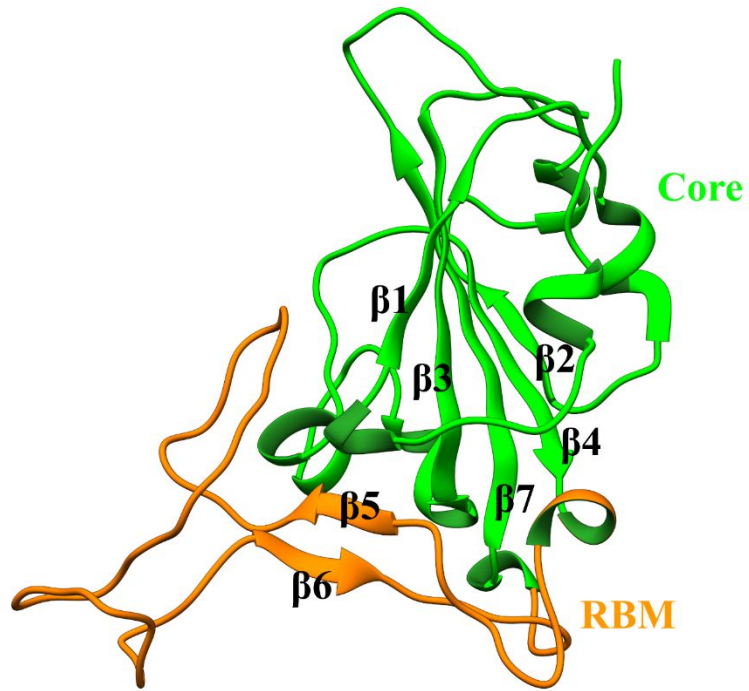

**Figure S1:** X-ray structure of RBD. The receptor binding membrane (RBM) is in orange and the core is in green color.

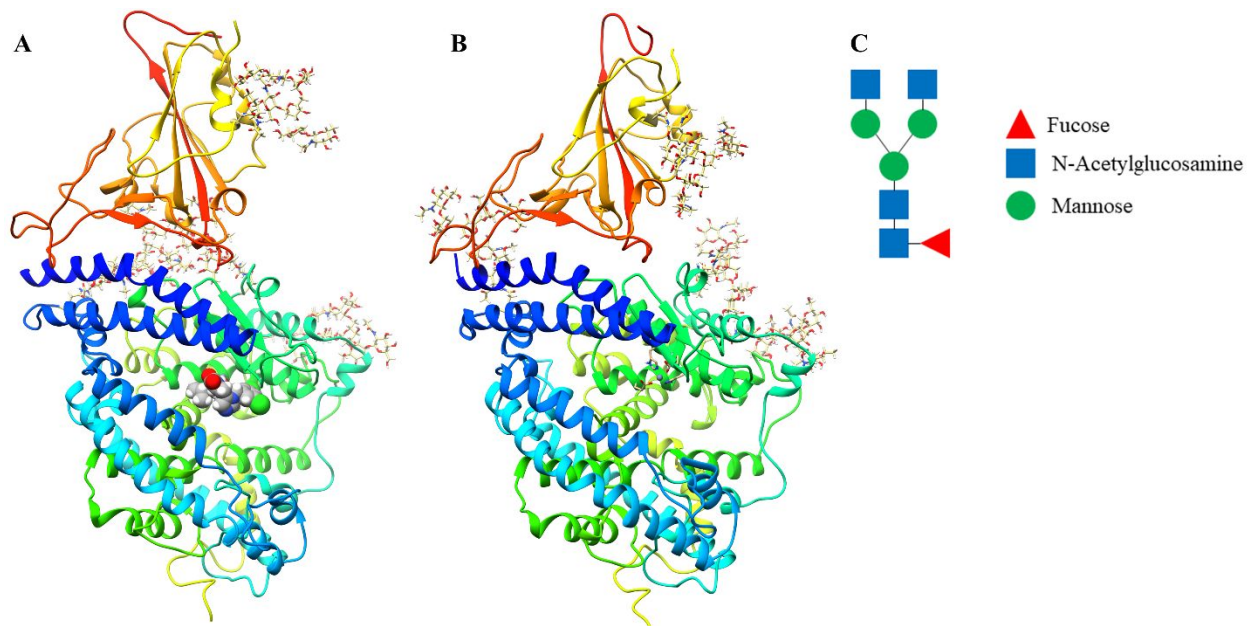

**Figure S2:** Equilibrated structure of ACE2-RBD-Inhibitor (A), ACE2-RBD (B) complex with larger N-Glycans, and structure of N-glycan (C).

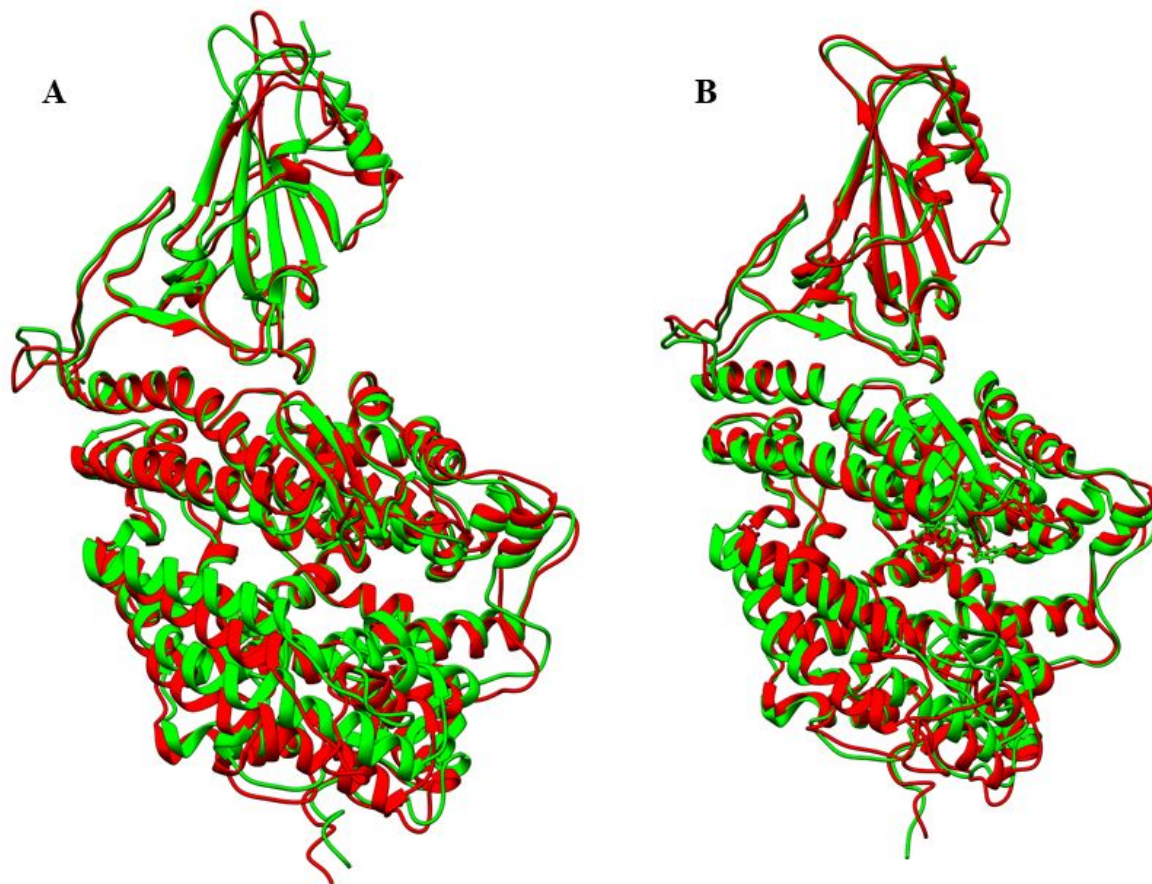

**Figure S3:** (A) Superimposed structure of ACE2-RBD (small N-glycan) in green and ACE2-RBD (large N-glycan) in red; (B) ACE2-RBD-Inhibitor (small N-glycan) in green and ACE2-RBD-Inhibitor (large N-glycan) in red.

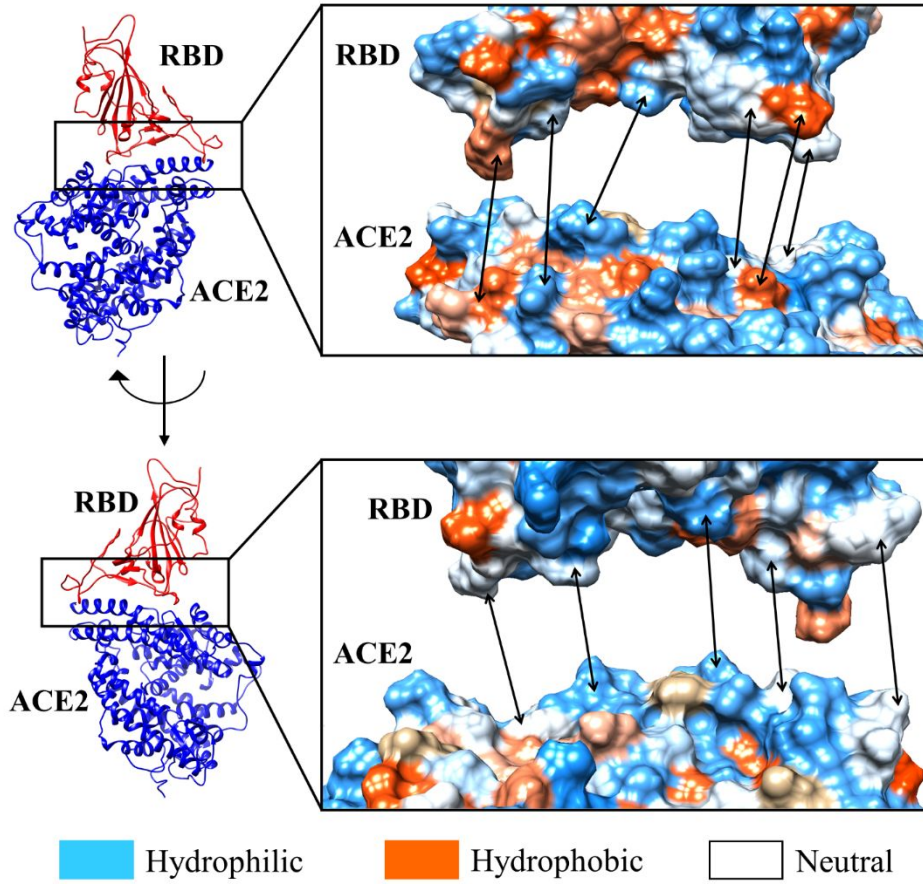

**Figure S4:** Hydrophobicity surface of ACE2 and RBD interface. Red represents hydrophobic, blue as hydrophilic, and white as neutral.

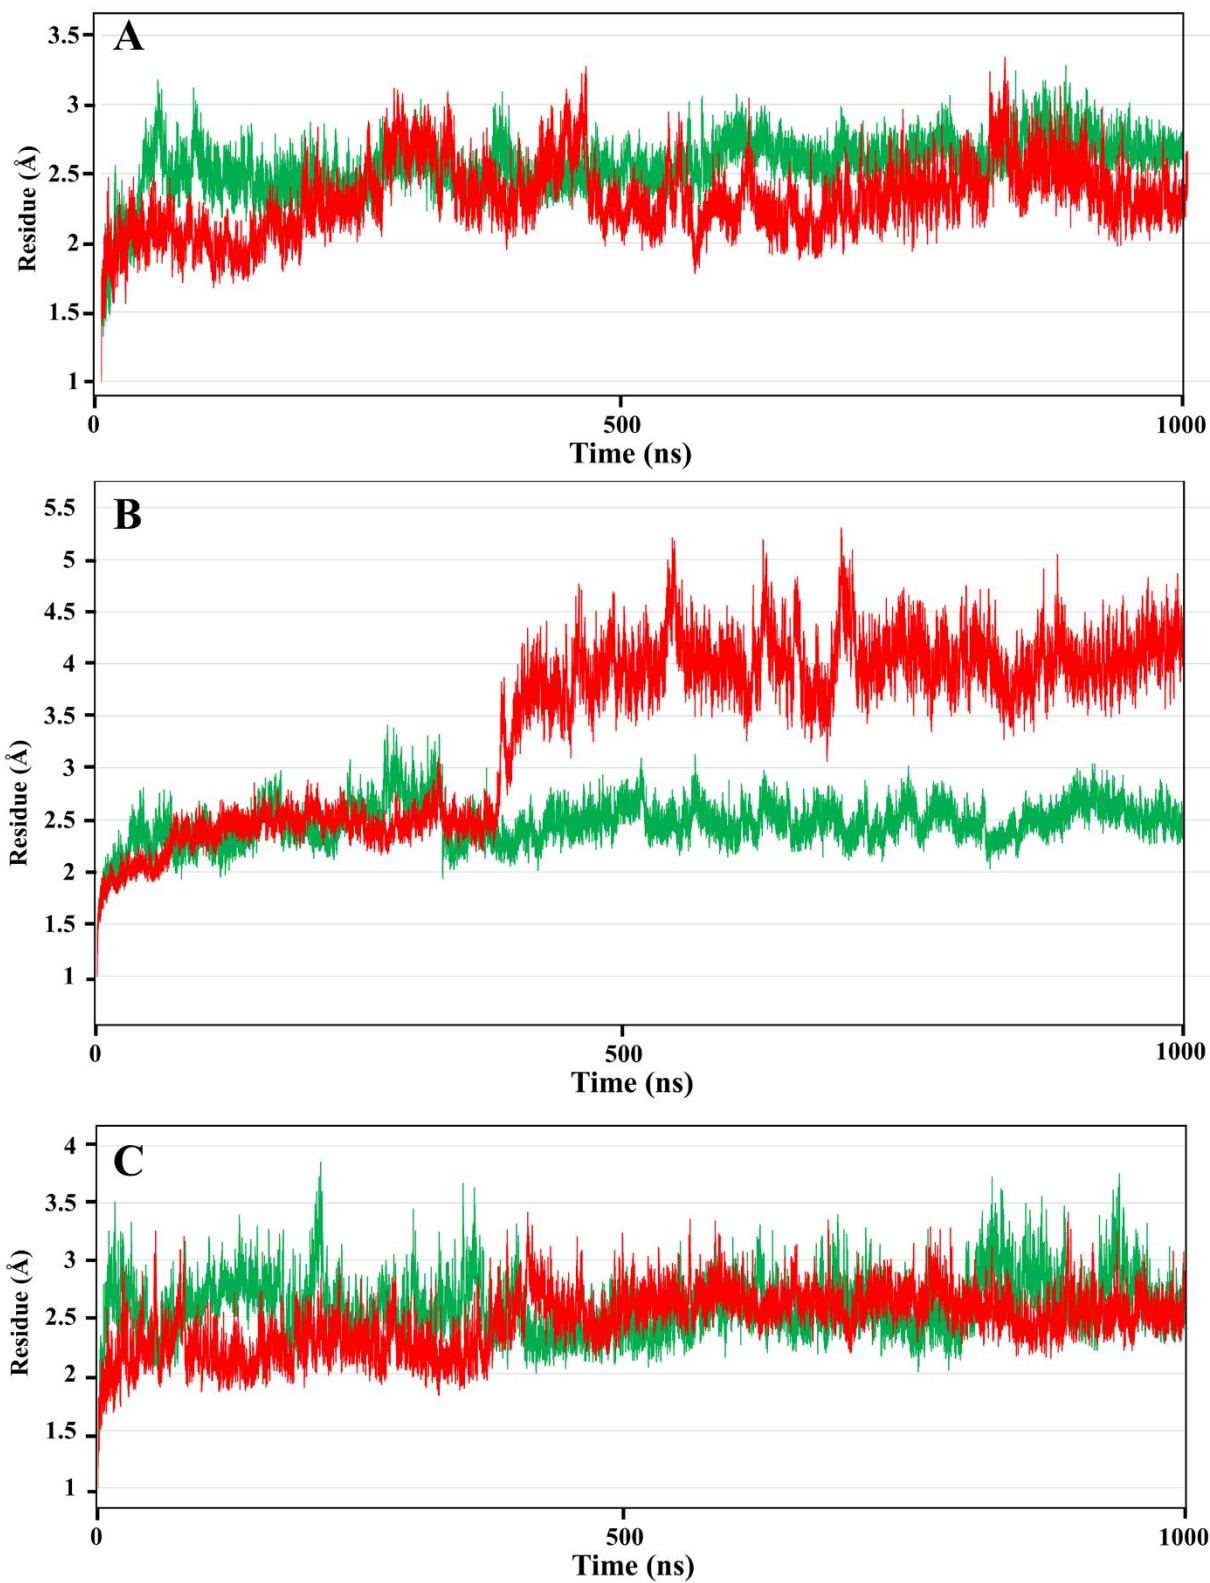

**Figure S5:** Per-residue root mean square deviation (RMSD) of; (A)  $A_O$  and  $A'_O$  (B)  $A_C$  and  $A'_C$ ; and (C)  $RA_O$  and  $RA'_O$  complex trajectories (Red = Inhibitor present, Green = Inhibitor absent).

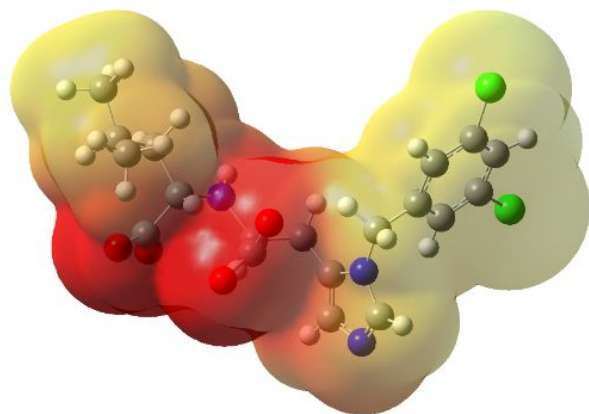

**Figure S6:** Electrostatic surface potential (ESP) of inhibitor MLN-4760.

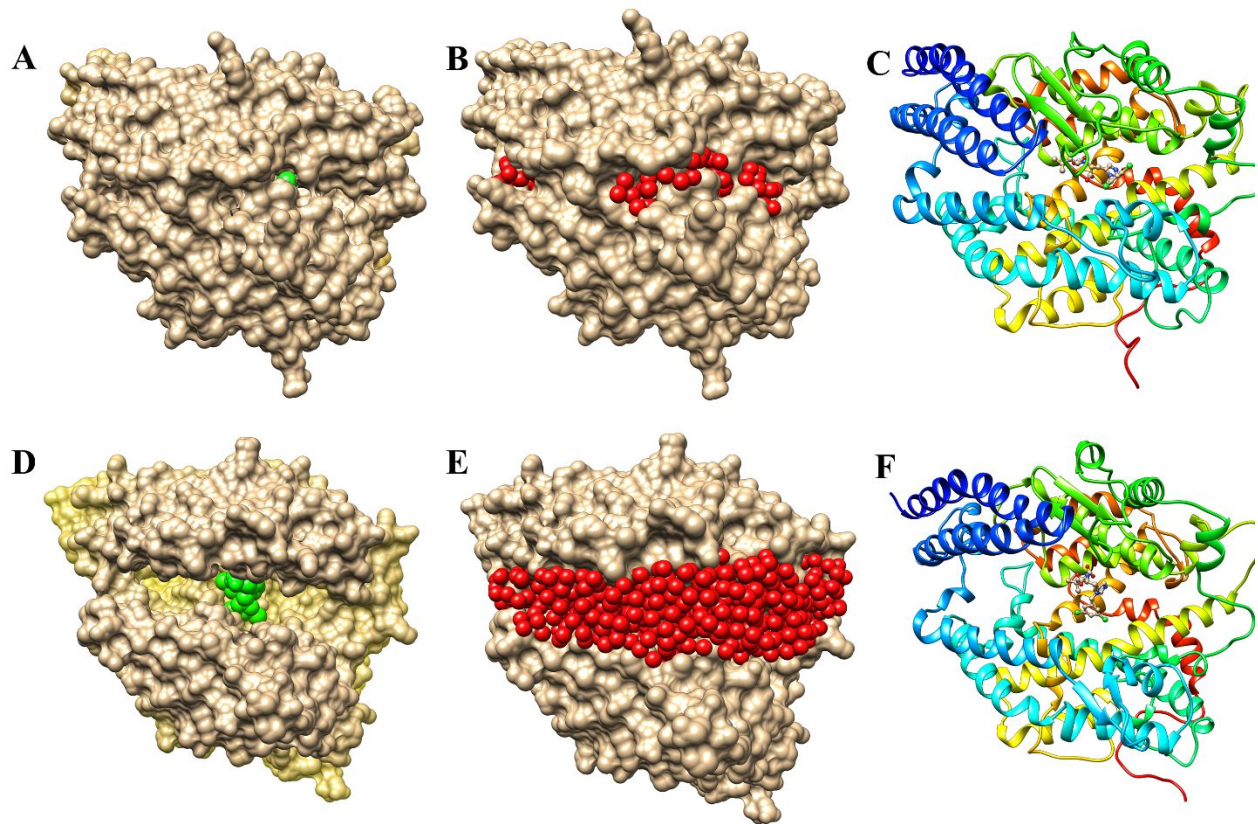

**Figure S7:** (A) ACE2 surface in a closed state; (B) water molecules trapped in the active site cleft of closed state ACE2 enzyme; (C) ribbon diagram for reference; (D) ACE2 surface in open state; (E) water molecules in the active site cleft of the open state ACE2 enzyme; and (F) ribbon diagram for reference.



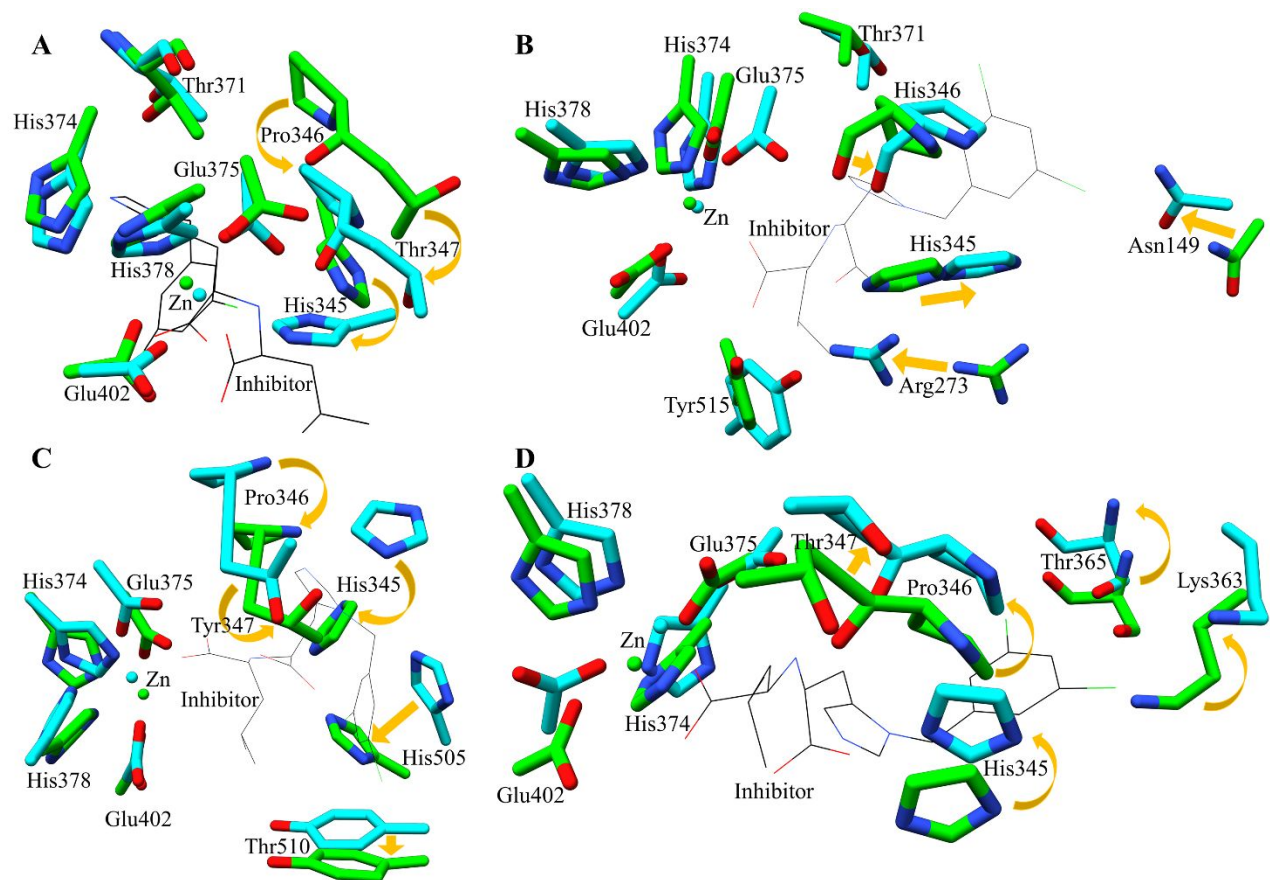

**Figure S8:** Superposition of the inhibitor bound (cyan carbons) and unbound (green carbons) structures; (A)  $A_0$  vs  $A'_0$ ; (B)  $A_C$  vs  $A'_{C1}$ ; (C)  $A_C$  vs  $A'_{C2}$ ; and (D)  $RA_0$  vs  $RA'_0$ .

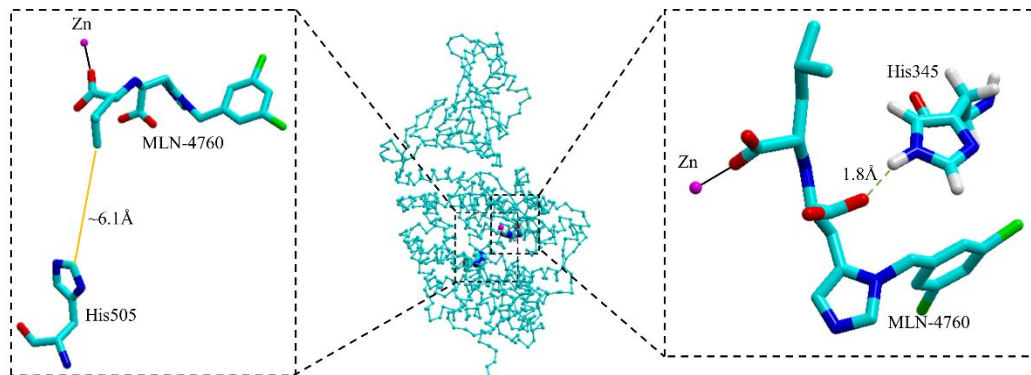

**Figure S9:** In  $RA'_0$  complex. H345 forms a hydrogen bond interaction with MLN-4760 while H505 was  $\sim 6.1$  apart.

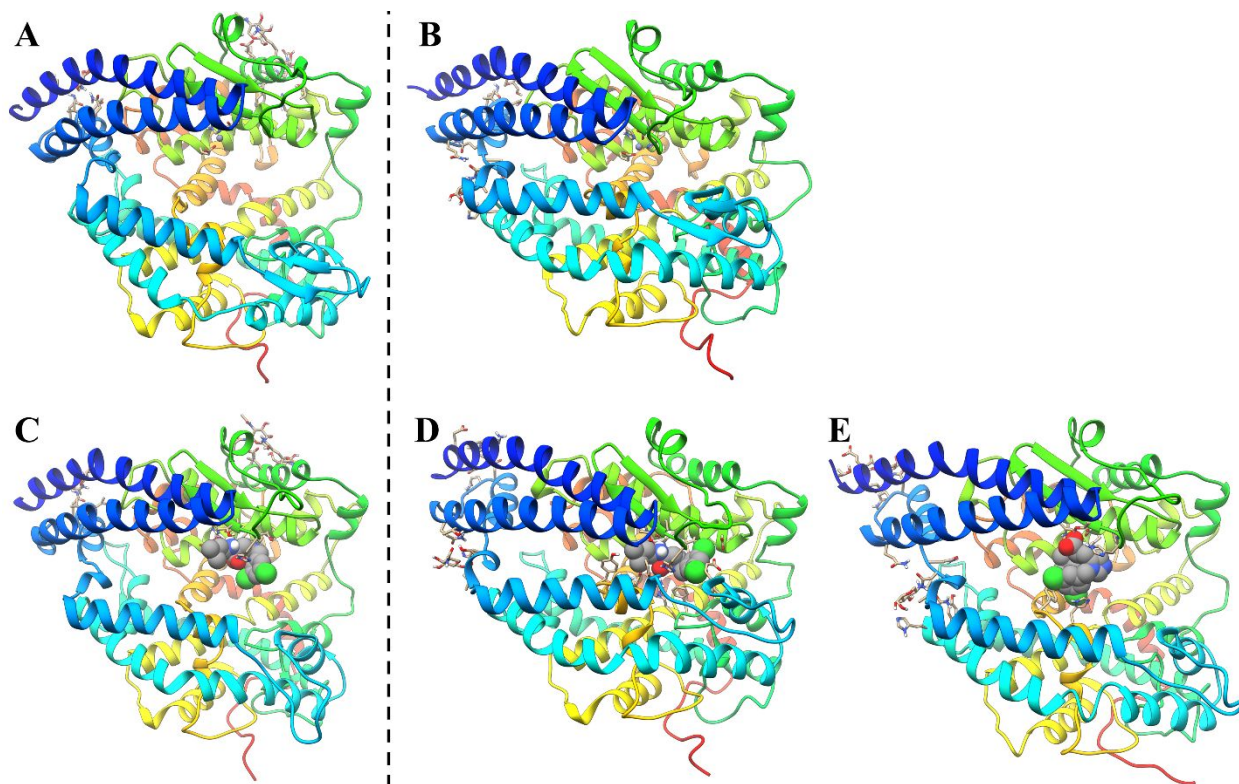

**Figure S10:** Most-representative structures of; (A, C)  $A_0$  and  $A'_0$  (B)  $A_C$ ; (D)  $A'_{C1}$ ; and (E)  $A'_{C2}$ .

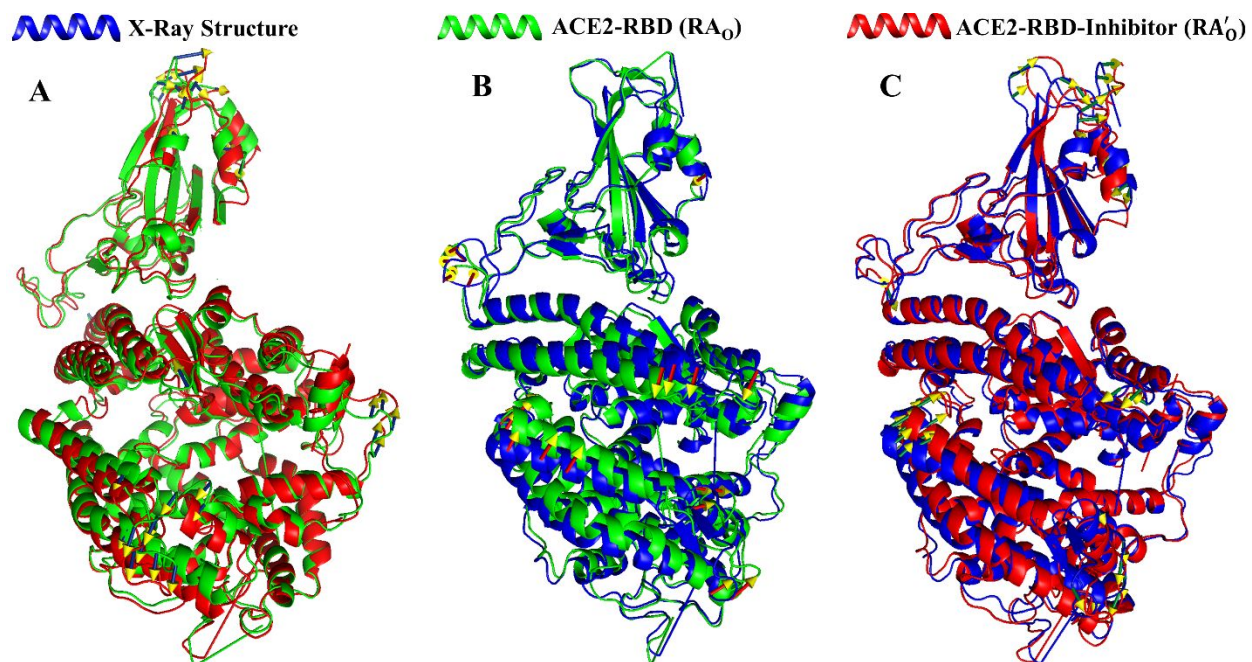

**Figure S11:** (A) Superimposed structure of ACE2-RBD ( $RA_0$ ) and ACE2-RBD-Inhibitor ( $RA'_0$ ); (B) X-Ray and ACE2-RBD ( $RA_0$ ); and (C) X-Ray and ACE2-RBD-Inhibitor ( $RA'_0$ ).

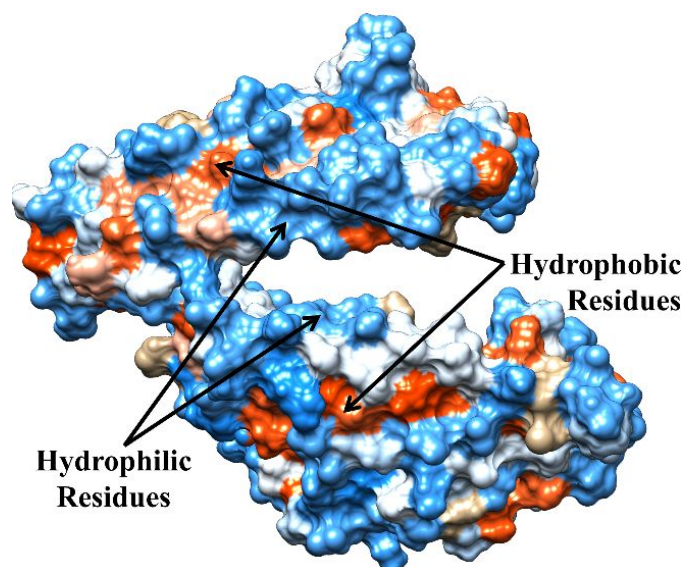

**Figure S12:** Hydrophobicity surface of ACE2. The hydrophilic residues present on  $\alpha 2$  and  $\alpha 3$  helices are facing each other while hydrophobic residues are on the opposite side of the  $\alpha 2$  and  $\alpha 3$  helices.

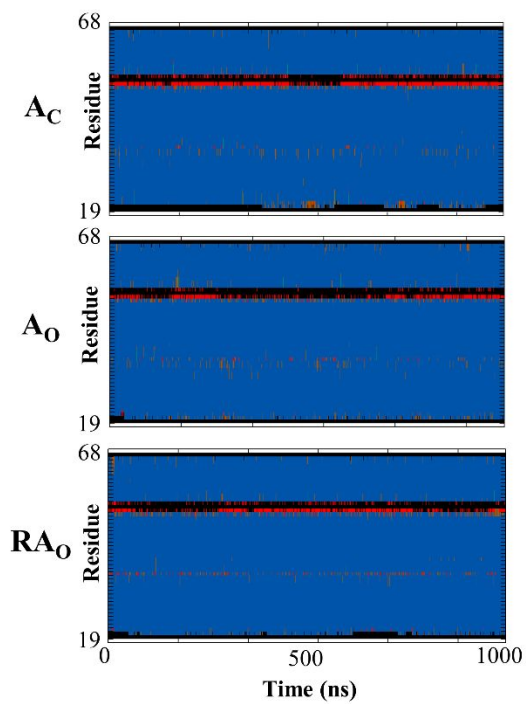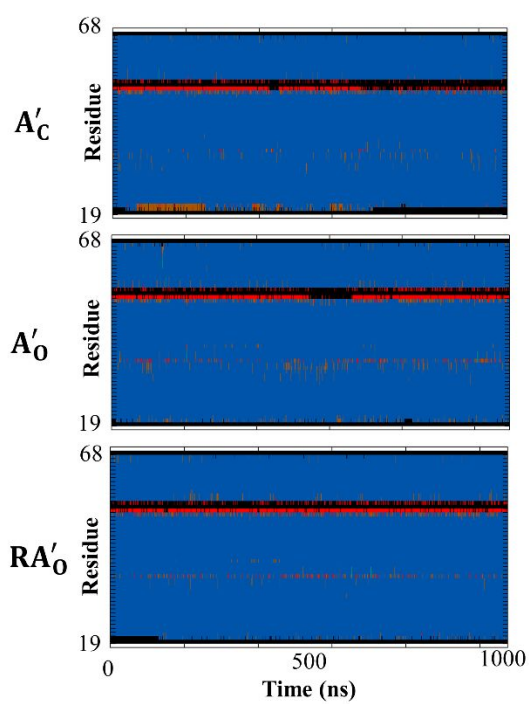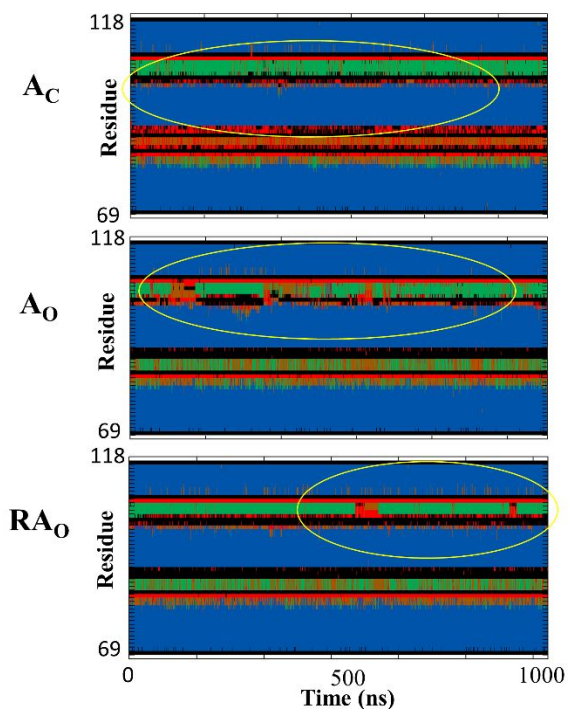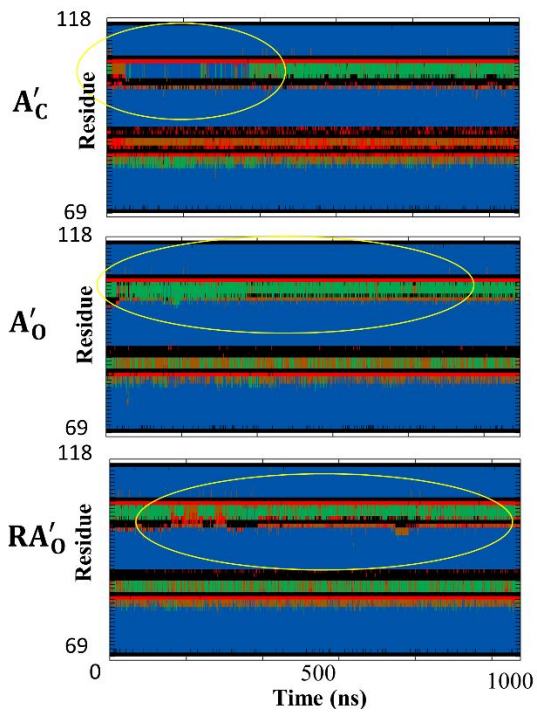

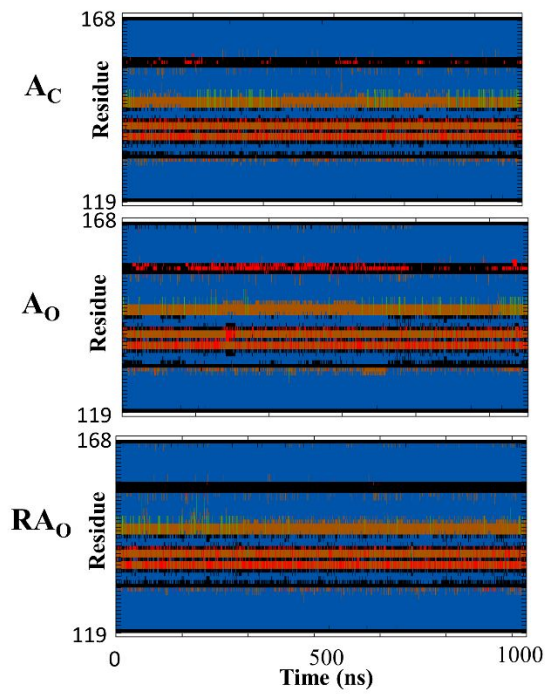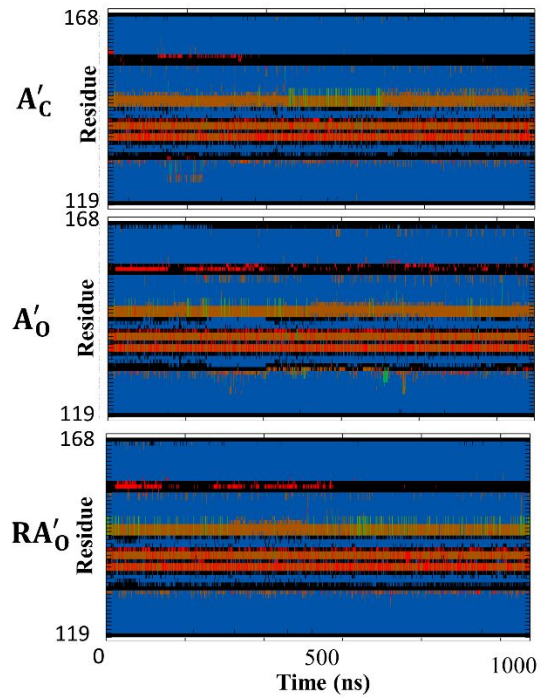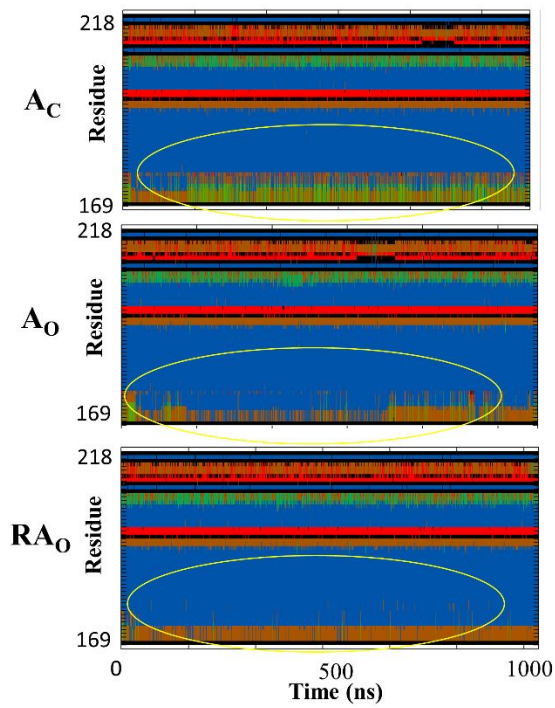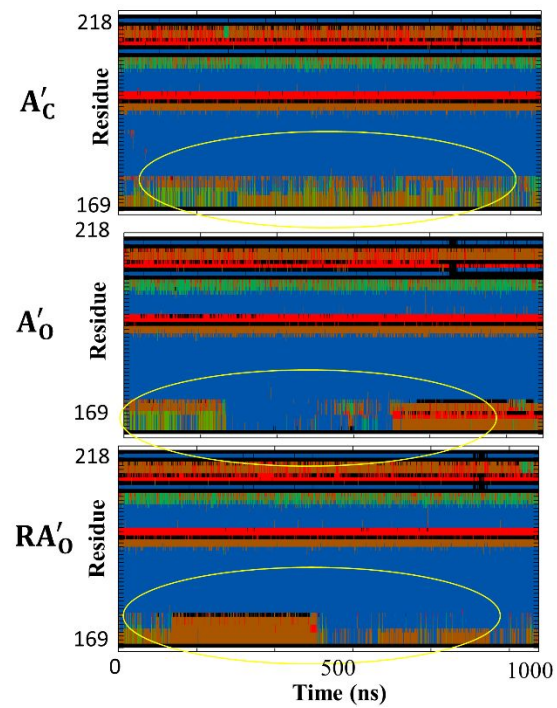

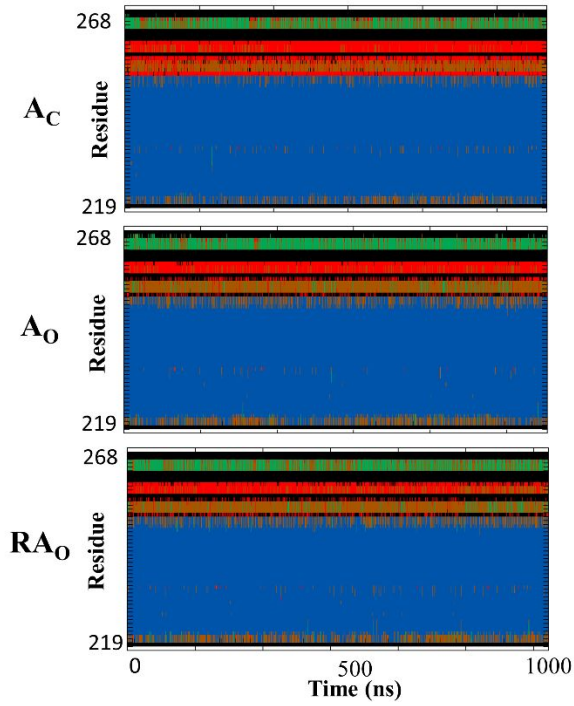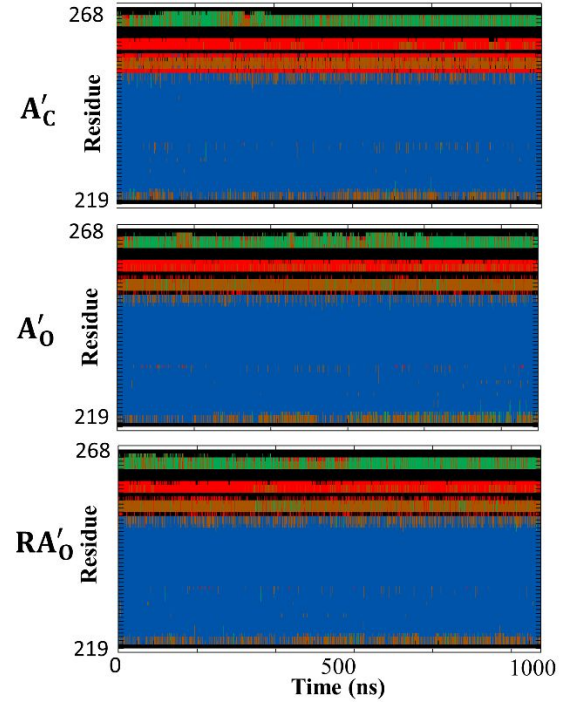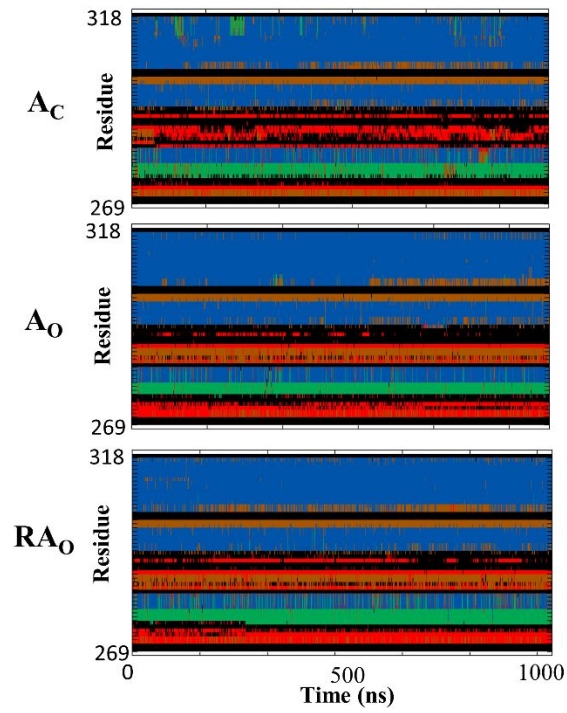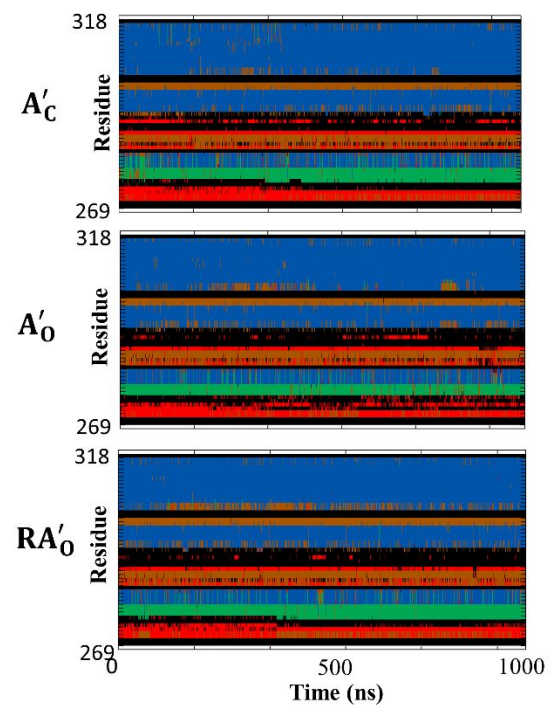



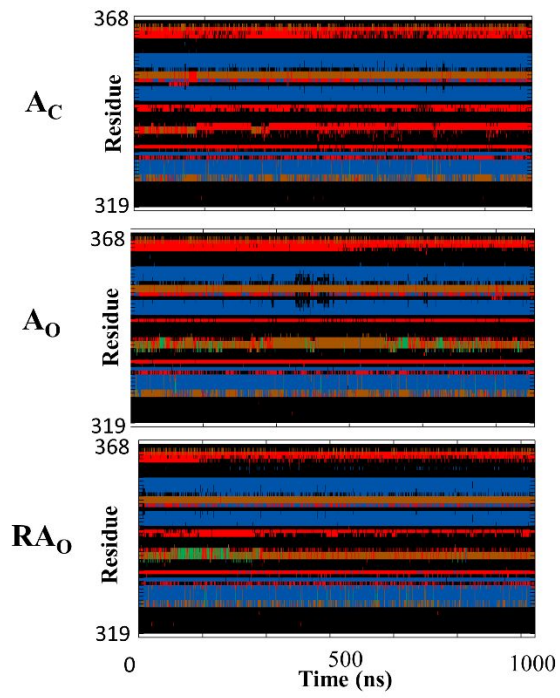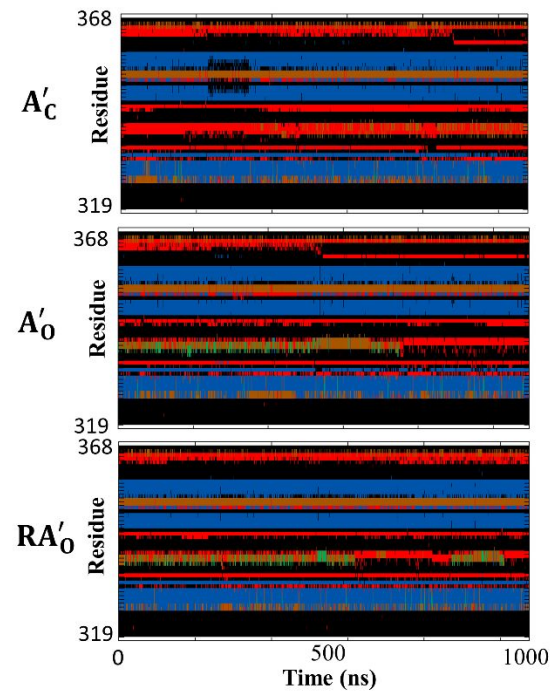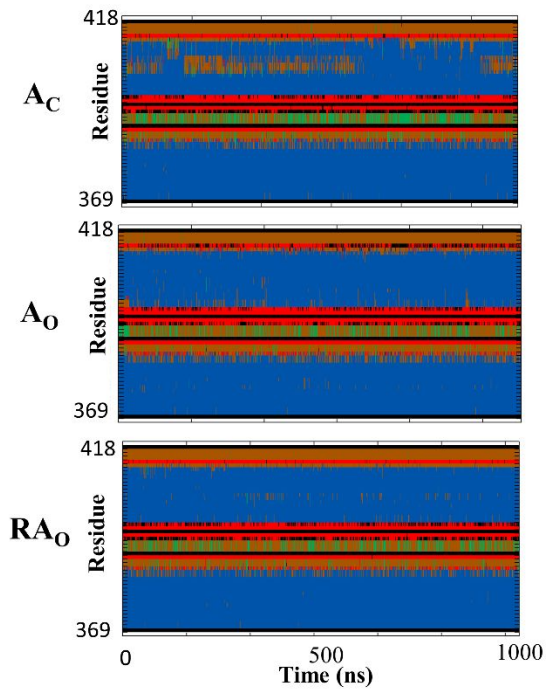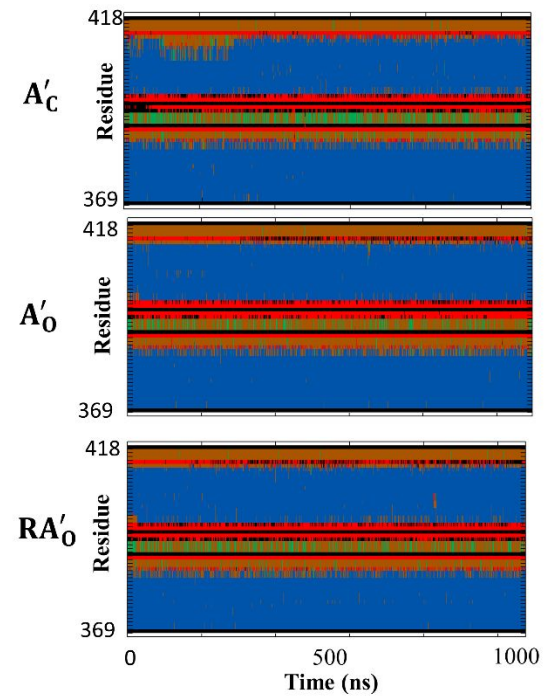

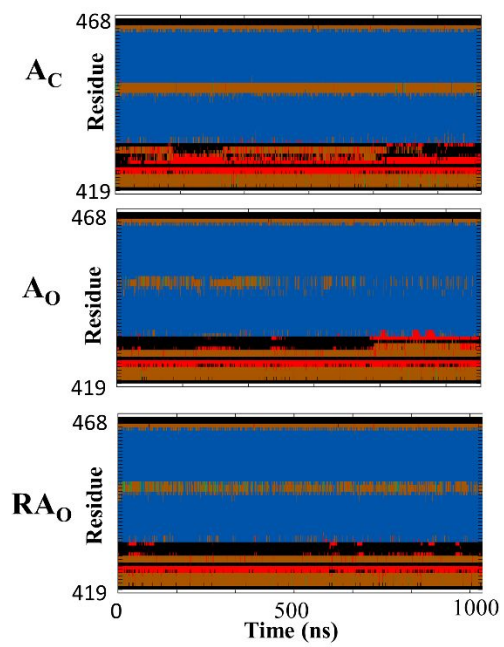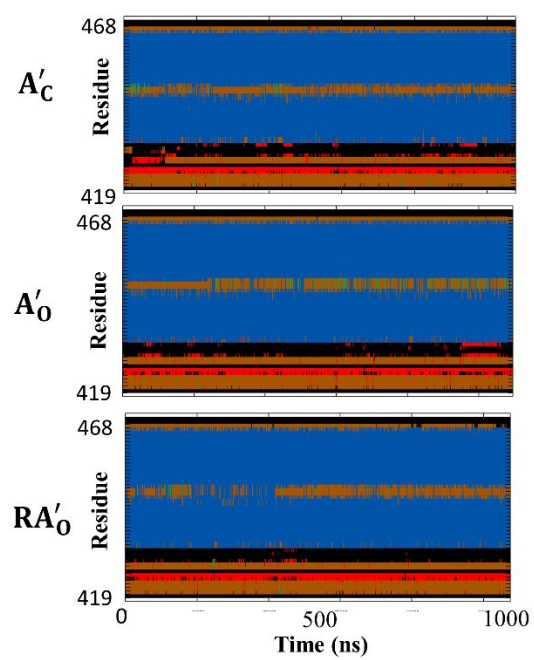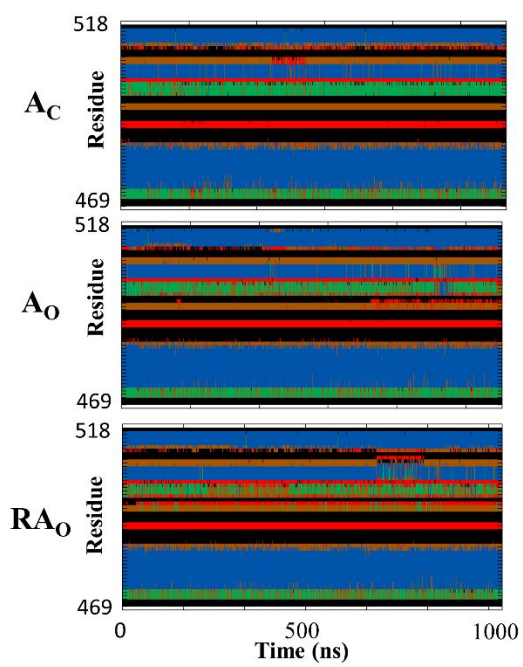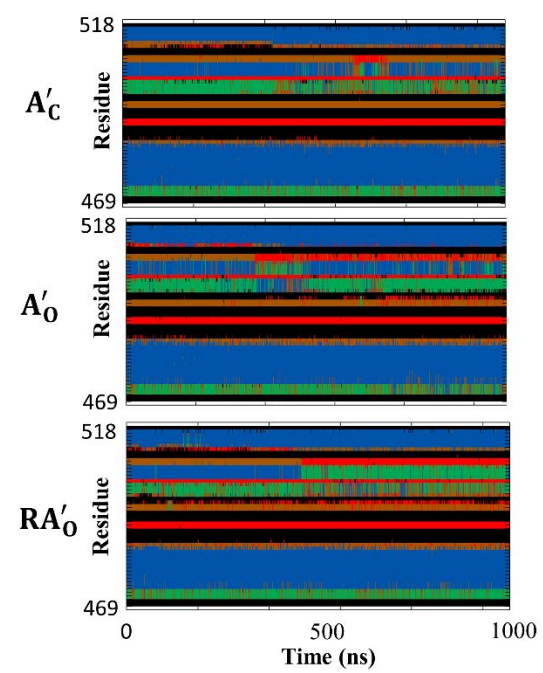

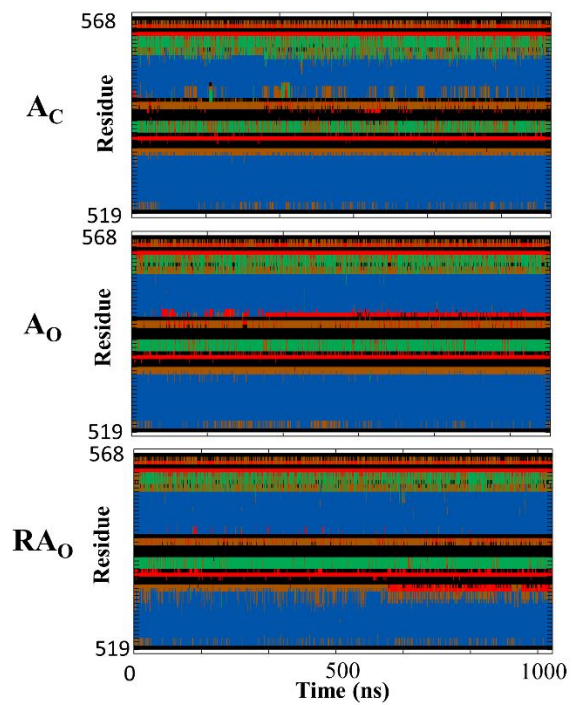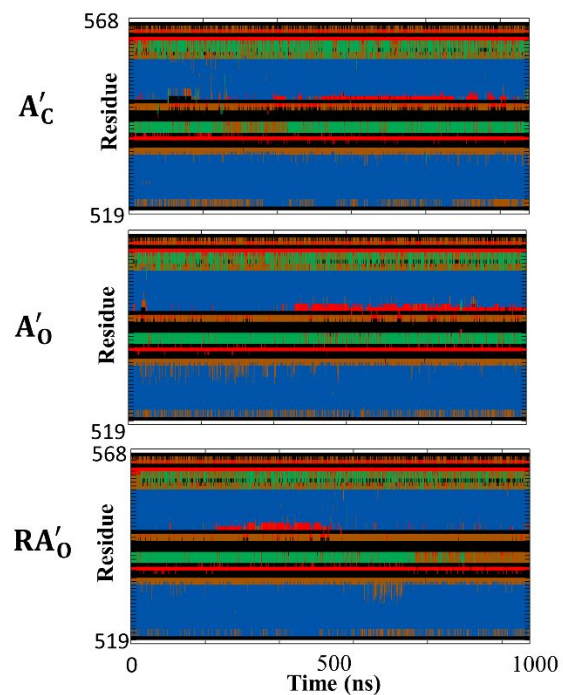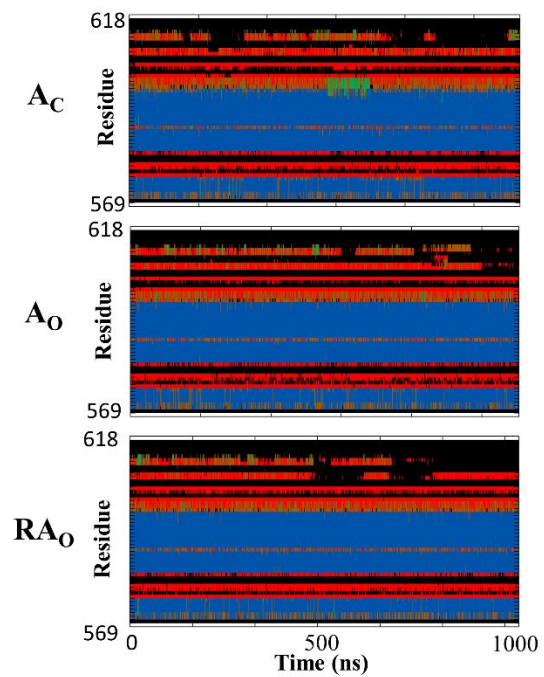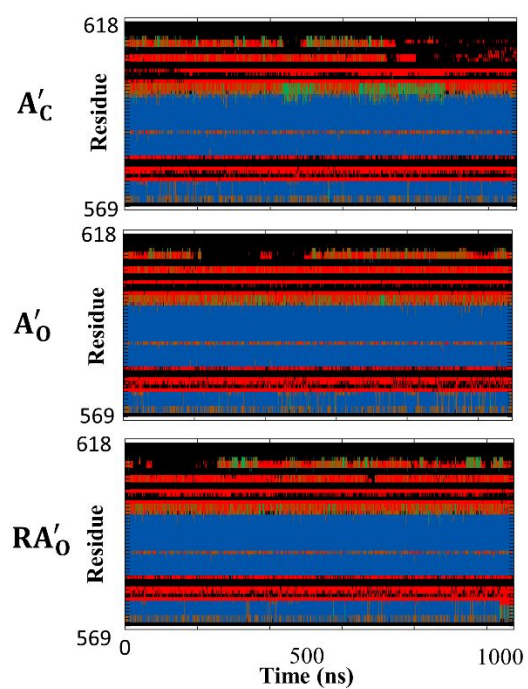

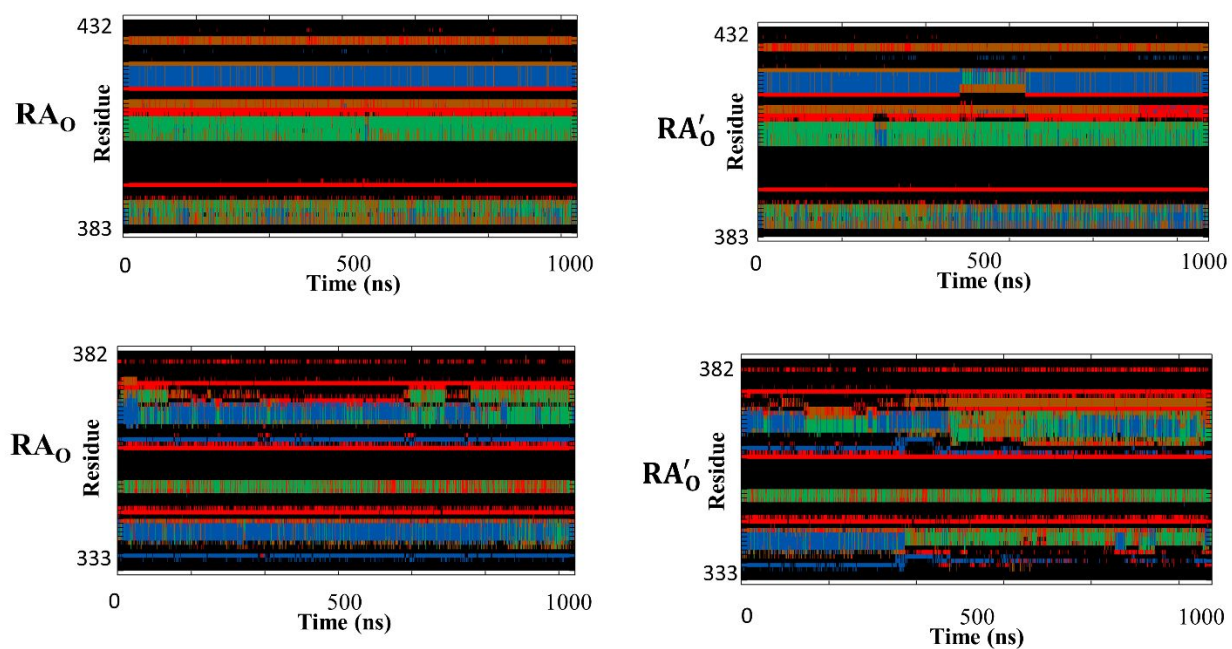

**Figure S13:** Secondary structure evolution (DSSP analysis) of six complexes throughout MD simulations.
